# Supplementary material
Source: publisher figshare collection journal article supplement (https://rs.figshare.com/ndownloader/files/14057225)
Supplement: Supplementary file 1 [file 14057225]

## Appendix: Infrastructure construction without information exchange – the trail clearing mechanism in *Atta* leaf-cutter ants

Bochynek T.\*, Burd M., Kleineidam C., Meyer B.

\*corresponding author: tom.bochynek@gmail.com

### Automatic traffic flow recording

The below plot shows a comparison of human and automated counts, based on 8 video fragments of 30 seconds length. The automated counts were on average 5.9% lower (mean signed difference; SD = 0.09%). Differences between counts are shown in Figure 1.

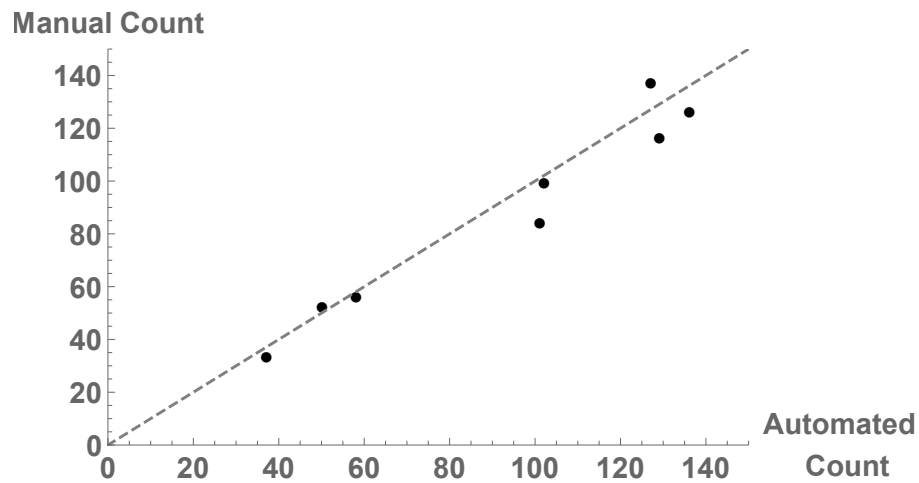

Figure 1: Comparison of human and automated counts. Dashed line indicates matching counts.

### Gillespie Algorithm details

In the implementation of the Gillespie algorithm we largely used method and notation given by (Twomey; 2007).

Given an initial amount of reagents (i.e., workers and obstructions) and reaction rates, the algorithm at the beginning of the experiment and at each removal event calculated the propensities of occurrence  $\alpha_i$  ( $i \in \mathbb{Z} : 1 \leq i \leq 4$ ) for each possible removal reaction  $w_i$  ( $i \in \mathbb{Z} : 1 \leq i \leq 4$ ) based on the involved reagents (see Table 4

in the manuscript body) and the encounter modifier function  $m(O)$ . It then generated the next reaction time  $\tau$  and reaction type  $w_\mu$  ( $\mu \in \mathbb{Z} : 1 \leq \mu \leq 4$ ) via two random numbers  $r_1$  and  $r_2$ . Pseudocode for the algorithm is given in Algorithm 1. A Mathematica notebook with the corresponding code is provided as electronic supplementary material.

```

 $t = 0;$ 
Initialise reagent counts;
while simulation running do
     $\alpha_0 = \sum_{i=1}^4 \alpha_i;$ 
     $r_{1,2} \sim U[(0,1)];$ 
     $\tau = \frac{1}{\alpha_0} \ln \left[ \frac{1}{r_1} \right];$ 
     $\mu = \min m\{m \in \mathbb{Z} : 1 \leq m \leq 4\} : \frac{1}{\alpha_0} \sum_{i=1}^m \alpha_i > r_2;$ 
     $t = t + \tau;$ 
    execute reaction  $w_\mu;$ 
end

```

**Algorithm 1:** Gillespie algorithm. See above text for details.

## References

Twomey, A. (2007). *On the stochastic modelling of reaction-diffusion processes*, PhD thesis, University of Oxford.
